# Supplementary material
Source: publisher figshare collection journal article supplement (https://acs.figshare.com/ndownloader/files/3876676)
Supplement: Supplementary file 1 [file 3876676]

# Facile and Green Preparation for the Formation of MoO<sub>2</sub>-GO

## Composites as Anode Material for Lithium-Ion Batteries

Shan Hu,<sup>†,‡</sup> Fei Yin,<sup>†</sup> Evan Uchaker,<sup>‡</sup> Wen Chen,<sup>\*,†</sup> Ming Zhang,<sup>‡</sup> Jing Zhou,<sup>†</sup>  
Yanyuan Qi,<sup>†</sup> and Guozhong Cao<sup>\*,‡</sup>

<sup>†</sup> State Key Laboratory of Advanced Technology for Materials Synthesis and Processing, School of Materials Science and Engineering, Wuhan University of Technology, Wuhan, 430070, PR China

E-mail: [chenw@whut.edu.cn](mailto:chenw@whut.edu.cn); Tel.: +86-27-87651107; Fax: +86-27-87760129.

<sup>‡</sup> Department of Materials Science and Engineering, University of Washington, Seattle, Washington 98195, United States

E-mail: [gzcao@u.washington.edu](mailto:gzca@u.washington.edu); Tel.: +1-206-616-9084; Fax: +1-206-543-3100.

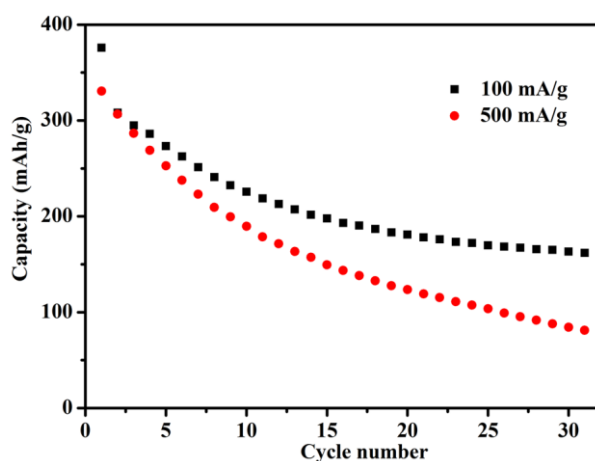

Figure S1. Cycling performance of the pure MoO<sub>2</sub> nanoparticles at current densities of 100 and 500 mA g<sup>-1</sup> over a voltage range of 0.01-3.0 V
